# Supplementary material for: Hypoxia-inducible factor-1α mRNA: a new target for destabilization by tristetraprolin in endothelial cells
Source: PubMed Central journal article supplement — Mol Biol Cell. 2011 Sep 15;22(18):3366–78. doi: 10.1091/mbc.E10-07-0617 (PMC3172262; doi:10.1091/mbc.e10-07-0617), 2011-09-15
Supplement: supp_E10-07-0617_CombinedSupMats.pdf [file supp_E10-07-0617_CombinedSupMats.pdf]

## Supplemental Material

**Table I:** Primer sequences used to generate short fragments from HIF-1 $\alpha$  mRNA 3'-UTR\*.

| Fragment     | Forward primer                                      |
|--------------|-----------------------------------------------------|
| F1           | 5'-ccc-aag-ctt-ggg-gaa-gcc-tgg-cta-caa-ta-3'        |
| F2           | 5'-ccc-aag-ctt-ggg-cat-taa-tgc-tctt-3'              |
| F3           | 5'-ccc-aag-ctt-ggg-aac-cat-tgc-att-gca-gta-3'       |
| F4           | 5'-ccc-aag-ctt-ggg-tag-gga-gtt-tat-ccct-3'          |
| F5           | 5'-ccc-aag-ctt-ggg-gaa-gat-gcc-aat-ata-aatt-3'      |
| F6           | 5'-ccc-aag-ctt-ggc-cta-tga-aat-tgt-taa-acc-tgg-3'   |
| F7           | 5'-ccc-aag-ctt-gga-taa-aat-tct-caa-ttc-ag-3'        |
| F8           | 5'-ccc-aag-ctt-gga-ata-tat-agt-tgt-cac-3'           |
| 895-1175 bp  | 5'-ccc-aag-ctt-tca-tgc-att-ctt-agg-aaaa-3'          |
| 989-1175 bp  | 5'-ccc-aag-ctt-cat-gta-gat-ttc-aat-aat-tg-3'        |
| 958-1175 bp  | 5'-ccc-aag-ctt-tgc-act-ttg-tcg-cta-tta-3'           |
| 1019-1175 bp | 5'-ccc-aag-ctt-gaa-gca-tta-ttt-tag-gaa-tat-ata-g-3' |
| 895-1019 bp  | 5'-ccc-aag-ctt-tca-tgc-att-ctt-agg-aaaa-3'          |

\* F1 to F8 fragments were generated by PCR with the forward primers indicated above and the same reverse primer 5'-gatgcgagctcgcttccacagaagat-3' containing the Sac I restriction site as mentioned in Material and Methods. The fragment 895-1019 was obtained using the forward primer indicated above and the reverse primer 5'-gat-cga-gct-cga-aga-tgt-tta-ttt-gac-taa-aat-tac-tca-att-att-gaa-atc-tac-at-3' in which a polyA site was inserted upstream of the Sac I restriction site.

**Table II:** Primer sequences used to generate full-length HIF-1 $\alpha$  3'-UTR, F7 and TTP mutants.

| Mutant                   | Forward primer                                                                                       |
|--------------------------|------------------------------------------------------------------------------------------------------|
| FL mARE c3               | 5'-aca-cct-ttt-ttt-tca-cat-ggg-aca-taa-ata-ata-atgc-3'                                               |
| FL mAB                   | 5'-cac-tac-cta-aag-cag-tct-atg-gat-att-ttc-tac-ata-taa-tgg-gag-aag-cct-ggc-tac-aat-act-3'            |
| F7 mut hexamer1          | 5'-gct-caa-aat-aca-atg-ttt-gat-gtg-atg-cac-ttt-gtc-gct-atta-3                                        |
| F7 mut hexamer 2         | 5'-ttc-aat-aat-tga-gta-atg-tga-gaa-gca-tta-ttt-tag-ga-3'                                             |
| F7 mut hexamer 3         | 5'-aat-ttt-aga-agg-att-atg-tga-gga-ata-tat-agt-tgt-3'                                                |
| F7 mut hexamer 2+3       | 5'-ttc-aat-aat-tga-gta-atg-tga-gaa-gca-tta-tgt-gag-gaa-tat-ata-gtt-gt-3'                             |
| F7 mut polyU             | 5'-ctt-tgt-cgc-tat-taa-cat-cct-ggt-ggt-cat-gta-gat-ttc-aat-tg-3'.                                    |
| F7 mut miR17-92 site     | 5'-tca-tgc-att-ctt-agg-aaa-att-gcc-tag-tat-gtt-aat-ttg-ctc-aaa-ata-caa-tgg-tgg-att-tta-taa-acg-gg-3' |
| TTP mutant zinc finger 1 | 5'-tac-ggg-gcc-aag-cgc-cag-ttt-gcc-c-3'                                                              |

**Chamboredon et al.**

|                          |                                           |
|--------------------------|-------------------------------------------|
| TTP mutant zinc finger 2 | 5'-aag-acg-gaa-ctc-cgc-cac-aag-ttc-tac-3' |
|--------------------------|-------------------------------------------|

**Table III:** Primer sequences used in RT-qPCR.

| Gene                        | Primer                                                                                                                                  |
|-----------------------------|-----------------------------------------------------------------------------------------------------------------------------------------|
| HIF-1 $\alpha$              | 5'-cta-cta-gtg-cca-cat-cat-cac-ca-3' (sense)<br>5'-gat-tgc-ccc-agc-agt-cta-cat-3' (antisense)                                           |
| 18s                         | 5'-aaa-cgg-cta-cca-cat-cca-ag-3' (sense)<br>5'-cct-cca-atg-gat-cct-cgt-ta-3' (antisense)                                                |
| luciferase-3'HIF-1 $\alpha$ | 5'-gta-ccg-aaa-ggt-ctt-acc-gg-3' (sense, luciferase specific)<br>5'-gcc-tgg-tcc-aca-gaa-gat-g-3' (antisense, 3'HIF-1 $\alpha$ specific) |

**Table IV:** TTP family siRNA sequences

|        | sequence                                                                                   |
|--------|--------------------------------------------------------------------------------------------|
| ZnF    | 5'-cgc-ugc-cac-uuc-auc-cac-aac-3' (Sense)<br>5'-ugu-gga-uga-agu-ggc-agc-ggg-3' (Antisense) |
| TIS11b | 5'-agg-gua-aca-aga-ugc-uca-acu-3' (Sense)<br>5'-uug-agc-auc-uug-uua-ccc-uug-3' (Antisense) |
| TIS11d | 5'-gug-gau-guu-cag-uuu-aga-3' (Sense)<br>5'-uuc-uaa-acu-gaa-cau-cca-cua-3' (Antisense)     |

TTP siRNAs and control siRNAs were purchased from Ambion (Austin, TX, USA).
